# Supplementary material for: Serum Uric Acid and Mortality Risk Among Hemodialysis Patients
Source: PubMed Central journal article supplement — Kidney Int Rep. 2020 Jun 2;5(8):1196–206. doi: 10.1016/j.ekir.2020.05.021 (PMC7403560; doi:10.1016/j.ekir.2020.05.021), 2020-06-02
Supplement: mmc1.pdf [file mmc1.pdf]

## **Supplemental material Table of Contents**

- Table S1. Mean follow-up time and number [percentage] of events in the total study population and stratified by SUA quartiles.
- Table S2. Analyzed subgroups in the present study.
- Figure S1. Plot showing the cumulative all-cause mortality incidences of patients in SUA quartiles and table showing the number of patients at risk during follow-up.
- Figure S2. Adjusted spline analysis for the association between SUA and all-cause mortality in patients treated in EMEA or Latin America.

**Table S1.** Mean follow-up time and number [percentage] of events in the total study population and stratified by SUA.

|                                  | Total<br>[n=16 057] | SUA quartiles [mg/dl] |                        |                        |                    |
|----------------------------------|---------------------|-----------------------|------------------------|------------------------|--------------------|
|                                  |                     | ≤ 5.0<br>[n=4 060]    | > 5.0-6.0<br>[n=4 128] | > 6.0-7.1<br>[n=3 948] | > 7.1<br>[n=3 921] |
| Follow-up time [months, mean±SD] | 21.8±16.9           | 20.4±16.7             | 21.8±17.3              | 22.4±17.0              | 22.5±16.5          |
| <b>Event (n, %)</b>              |                     |                       |                        |                        |                    |
| Death (all cause)                | 2 791 [17.4]        | 941 [23.2]            | 730 [17.7]             | 585 [14.8]             | 535 [13.6]         |
| <i>Death (CV disease)</i>        | 1 203 [7.5]         | 395 [9.7]             | 309 [7.5]              | 265 [6.7]              | 234 [6.0]          |
| Transplantation                  | 1 464 [9.1]         | 299 [7.4]             | 350 [8.5]              | 407 [10.3]             | 408 [10.4]         |
| Center change                    | 1 670 [10.4]        | 326 [8.0]             | 417 [10.1]             | 422 [10.7]             | 505 [12.9]         |
| Treatment change*                | 525 [3.3]           | 145 [3.6]             | 133 [3.2]              | 128 [3.2]              | 119 [3.0]          |
| Unspecified reason               | 142 [0.9]           | 41 [1.0]              | 28 [0.7]               | 30 [0.8]               | 43 [1.1]           |
| Lost to follow-up                | 119 [0.7]           | 27 [0.7]              | 28 [0.7]               | 29 [0.7]               | 35 [0.9]           |
| End of data extraction           | 9 346 [58.2]        | 2 281 [56.2]          | 2 442 [59.2]           | 2 347 [59.5]           | 2 276 [58.1]       |

Data are presented as mean ± SD for the follow-up time and as number [percentage] for the different event types; \*Treatment change includes peritoneal dialysis, home hemodialysis, treatment stop, spontaneous recovery

**Table S2.** Analyzed subgroups in the present study.

| <b>Subgroup</b>                        | <b>Number of patients</b> | <b>SUA (mg/dl, mean±SD)</b> | <b>Number of deaths</b> |
|----------------------------------------|---------------------------|-----------------------------|-------------------------|
| <b><i>LTI</i></b>                      |                           |                             |                         |
| LTI ≤ median (12.4 kg/m <sup>2</sup> ) | 8 029                     | 5.9±1.6                     | 1 790 [22.3%]           |
| LTI > median (12.4 kg/m <sup>2</sup> ) | 8 028                     | 6.4±1.8                     | 1 001 [12.5%]           |
| <b><i>FTI</i></b>                      |                           |                             |                         |
| FTI ≤ median (12.6 kg/m <sup>2</sup> ) | 8 029                     | 6.1±1.7                     | 1 332 [16.6%]           |
| FTI > median (12.6 kg/m <sup>2</sup> ) | 8 028                     | 6.1±1.7                     | 1 459 [18.2%]           |
| <b><i>Regions</i></b>                  |                           |                             |                         |
| EMEA                                   | 15 127                    | 6.1±1.7                     | 2 654 [17.5%]           |
| Latin America                          | 930                       | 5.9±2.1                     | 137 [14.7%]             |

SUA levels are presented as mean ± SD.

## Supplemental Figure Legends

**Figure S1. Plot showing the cumulative all-cause mortality incidences of patients in different SUA strata.** Change to PD, transplantation and termination of dialysis treatment were considered as competing events, all other drop-out reasons were censored. Statistical analysis was performed with the Gray's test.

**Figure S2. Adjusted spline analysis for the association between SUA and all-cause mortality in patients treated in EMEA or Latin America.** Displayed are the subdistributional hazard ratios and confidence intervals across different SUA levels for patients treated in EMEA or Latin America. Black bars indicate the number of patients for different SUA levels (Q1: first quartile; M: median; Q3: third quartile). Adjustment comprised age, sex, ethnicity, dialysis vintage, comorbidities (diabetes mellitus, cardiovascular disease, liver disease, cancer), vascular access, LTI and FTI.

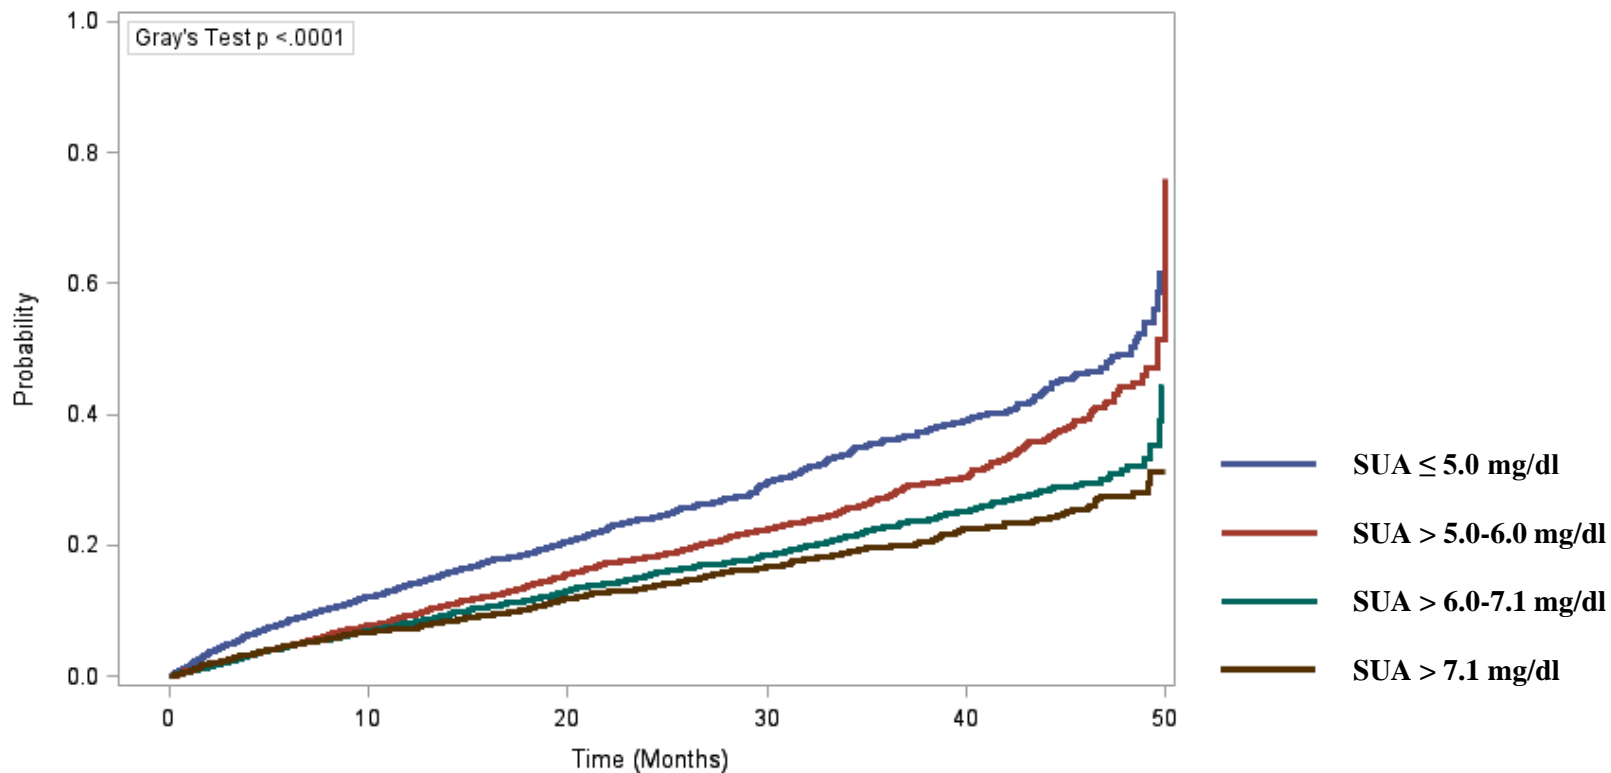

| Follow-up<br>time [month] | Patients at risk   |                        |                        |                    |
|---------------------------|--------------------|------------------------|------------------------|--------------------|
|                           | SUA ≤ 5.0<br>mg/dl | SUA > 5.0-6.0<br>mg/dl | SUA > 6.0-7.1<br>mg/dl | SUA > 7.1<br>mg/dl |
| 0                         | 4060               | 4128                   | 3948                   | 3921               |
| 6                         | 3129               | 3317                   | 3197                   | 3214               |
| 12                        | 2438               | 2614                   | 2556                   | 2650               |
| 18                        | 1882               | 2001                   | 1997                   | 2093               |
| 24                        | 1419               | 1570                   | 1615                   | 1607               |
| 30                        | 1055               | 1208                   | 1253                   | 1248               |
| 36                        | 758                | 896                    | 918                    | 918                |
| 42                        | 518                | 621                    | 608                    | 633                |
| 48                        | 342                | 418                    | 399                    | 403                |
| 50                        | 289                | 355                    | 324                    | 291                |

**Figure S1**

# EMEA

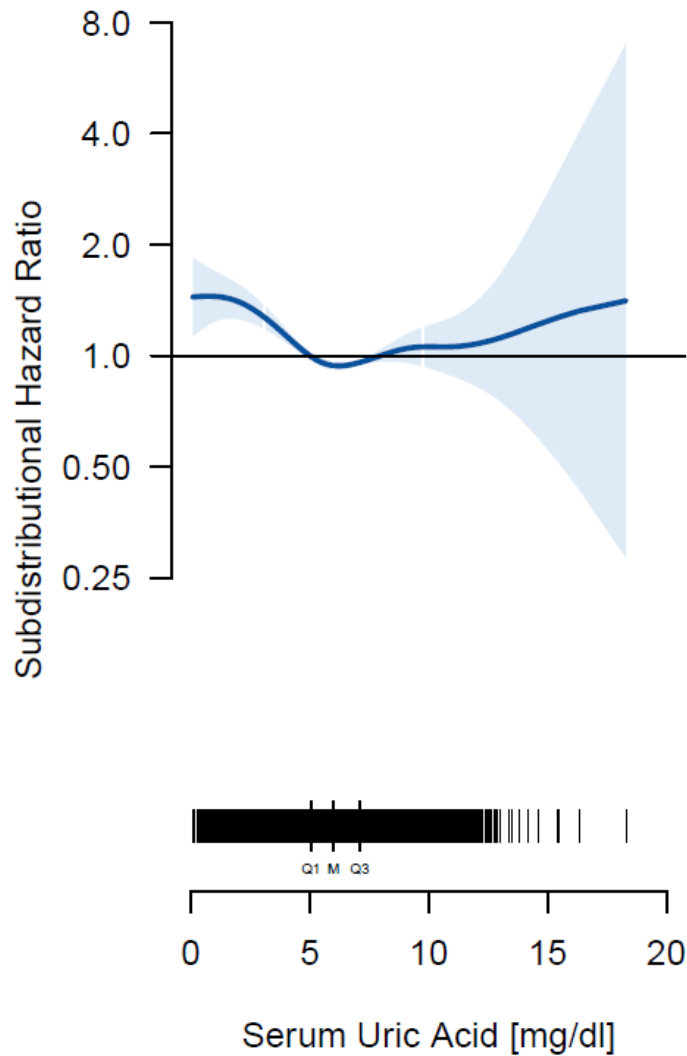

# Latin America

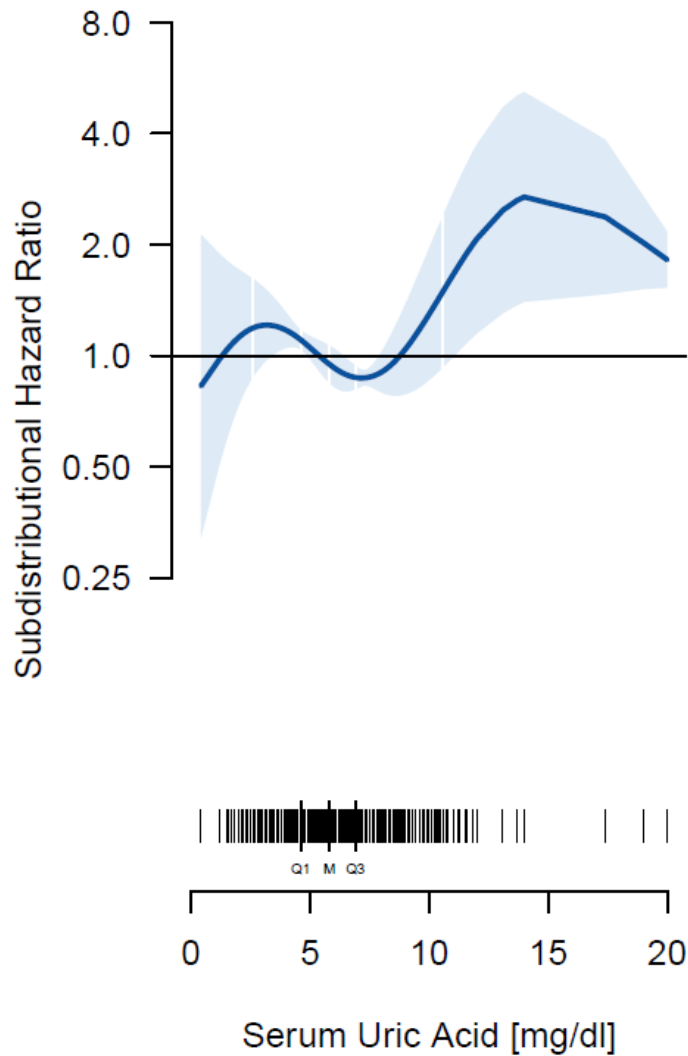

**Figure S2**
